# Postpartum Diabetes Screening

## Adherence rate and the performance of fasting plasma glucose versus oral glucose tolerance test

SARAH KWONG, MD  
REBECCA S. MITCHELL, MD

PETER A. SENIOR, MBBS, PHD  
CONSTANCE L. CHIK, MD, PHD

**OBJECTIVE** — To determine the rate of adherence to postpartum glycemic testing in women with gestational diabetes mellitus (GDM) and the performance of fasting plasma glucose (FPG) versus the 75-g oral glucose tolerance test (OGTT) in detecting postpartum glucose intolerance.

**RESEARCH DESIGN AND METHODS** — The study was a retrospective cohort of 1,006 women with GDM attending a pregnancy diabetes clinic.

**RESULTS** — Postpartum screening was completed in 438 (48%) women. Women nonadherent to testing had higher parity (1.10 vs. 0.87) and were less likely to require insulin for management of their GDM. Among women who were tested, 89 (21%) had an abnormal result, only 25 (28%) of whom were identified by FPG. Factors associated with abnormal postpartum diabetes screening include non-Caucasian ethnicity, previous GDM, higher A1C, and OGTT values during pregnancy and treatment with insulin.

**CONCLUSIONS** — The rate of postpartum diabetes screening is low, and FPG lacks sensitivity as a screening test in comparison with OGTT.

*Diabetes Care* 32:2242–2244, 2009

**G**estational diabetes mellitus (GDM) strongly predicts future development of type 2 diabetes (1), and abnormal glucose tolerance can persist postpartum leading to impaired fasting glucose (IFG), impaired glucose tolerance (IGT), and type 2 diabetes (2). Compared with an oral glucose tolerance test (OGTT), fasting plasma glucose (FPG) has greater reproducibility but may lack sensitivity to identify women with IGT or type 2 diabetes (3–5). The main study objectives were to assess adherence with postpartum testing, to identify factors associated with nonadherence, and to compare the sensitivity of FPG versus a 75-g OGTT in detecting postpartum glucose intolerance.

### RESEARCH DESIGN AND

**METHODS** — A retrospective cohort study was conducted in women with GDM and IGT of pregnancy seen at the

Grey Nuns Community Hospital Gestational Diabetes Clinic, Edmonton, Alberta, from April 1999 to March 2006. The study was approved by the University of Alberta Health Research Ethics Board. Women were referred to the clinic based on screening at 24–32 weeks' gestation as per existing Canadian guidelines (6). A 1-h plasma glucose (PG) measurement after a 50-g glucose load of  $\geq 10.3$  mmol/l was considered as diagnostic of GDM, and  $< 7.8$  mmol/l was considered normal (7). An indeterminate value (7.8–10.2 mmol/l) prompted a 75-g OGTT, with two or more abnormal values (FPG  $\geq 5.3$  mmol/l, 1-h PG  $\geq 10.6$  mmol/l, and 2-h PG  $\geq 8.9$  mmol/l) (7) diagnostic of GDM, and a single elevated value was diagnostic of IGT of pregnancy.

All consecutive women with GDM or IGT of pregnancy were included. Women with preexisting hyperglycemia (type 1 or type 2 diabetes, IFG, or IGT) and those

who did not undergo a routine gestational diabetic screen were excluded. Data were obtained from patient medical records, including age, parity, ethnicity (Caucasian versus non-Caucasian), self-reported prior history of GDM and family history of diabetes (first- or second-degree relatives), self-reported prepregnancy weight and BMI, initial A1C value, insulin use during pregnancy (yes versus no), and postpartum diabetes screening values (FPG or 75-g OGTT). Diabetes was defined as FPG  $\geq 7$  mmol/l or 2-h PG  $\geq 11.1$  mmol/l, IFG as FPG of 6.1–6.9 mmol/l, and IGT as 2-h PG of 7.8–11.1 mmol/l (6). To promote adherence to postpartum testing, requisitions were given to women at 35–40 weeks' gestation for testing between 6 weeks and 6 months postpartum, and they received a phone reminder if testing was not completed by 6 months.

The data were tabulated in Microsoft Excel software (Microsoft, Redmond, WA). The  $\chi^2$  test for categorical or *t* test for continuous variables and logistic regression with calculation of odds ratio for significant values were used to analyze for differences between the women who underwent postpartum testing and those who did not and for the variables associated with postpartum hyperglycemia.

**RESULTS** — A total of 1,006 women were seen at the clinic between April 1999 and March 2006, of whom 97 were excluded. Table 1 presents the characteristics of the 909 study participants. There were 438 (48.2%) women who underwent postpartum testing, in whom 21 only completed an FPG. Women nonadherent to testing had a higher parity (odds ratio [OR] 1.39,  $P = 0.02$ , nulliparity versus higher parity) and were less likely to have used insulin (OR 0.65,  $P = 0.003$ ) during pregnancy than women who adhered to testing but did not otherwise differ (Table 1). A total of 14 women who had postpartum testing were diagnosed with type 2 diabetes, while 15 had IFG, 57 had IGT, and 3 had both. The FPG and OGTT were abnormal in 25 (5.7%) and 89 (21.3%) women, respectively, whereas only five women had both abnormal FPG and 2-h PG values. If only an FPG was

From the Division of Endocrinology and Metabolism, Faculty of Medicine and Dentistry, University of Alberta, Edmonton, Canada.

Corresponding author: Constance L. Chik, cchik@ualberta.ca.

Received 18 May 2009 and accepted 2 September 2009. Published ahead of print at <http://care.diabetesjournals.org> on 9 September 2009. DOI: 10.2337/dc09-0900.

© 2009 by the American Diabetes Association. Readers may use this article as long as the work is properly cited, the use is educational and not for profit, and the work is not altered. See <http://creativecommons.org/licenses/by-nc-nd/3.0/> for details.

The costs of publication of this article were defrayed in part by the payment of page charges. This article must therefore be hereby marked "advertisement" in accordance with 18 U.S.C. Section 1734 solely to indicate this fact.

Table 1—Characteristics of women by adherence to postpartum glucose testing status

|                                       | Total study cohort | Adherent to postpartum testing | Nonadherent to postpartum testing | P      |
|---------------------------------------|--------------------|--------------------------------|-----------------------------------|--------|
| n                                     | 909                | 438                            | 471                               |        |
| Age (years)                           | 31.7 ± 4.9         | 32.0 ± 4.5                     | 31.4 ± 5.1                        | 0.06   |
| Parity                                | 0.99 ± 1.1         | 0.87 ± 0.97                    | 1.10 ± 1.20                       | 0.002* |
| Ethnicity                             |                    |                                |                                   |        |
| Caucasian                             | 529 (58.3)         | 247 (56.4)                     | 282 (60.1)                        | 0.34   |
| Non-Caucasian                         | 379 (42.7)         | 190 (43.4)                     | 189 (39.9)                        |        |
| Previous GDM                          |                    |                                |                                   |        |
| Present                               | 186 (20.6)         | 83 (18.9)                      | 103 (21.9)                        | 0.28   |
| Absent                                | 715 (79.4)         | 353 (80.6)                     | 362 (76.8)                        |        |
| Family history of diabetes            |                    |                                |                                   |        |
| Present                               | 596 (66.4)         | 286 (65.3)                     | 310 (65.8)                        | 0.87   |
| Absent                                | 301 (33.6)         | 147 (33.6)                     | 154 (32.7)                        |        |
| OGTT during pregnancy (mmol/l)        |                    |                                |                                   |        |
| Fasting                               | 5.0 ± 0.7          | 5.0 ± 0.7                      | 5.0 ± 0.7                         | 0.75   |
| 1-h PG                                | 10.9 ± 1.4         | 11.0 ± 1.5                     | 10.9 ± 1.4                        | 0.20   |
| 2-h PG                                | 8.8 ± 1.5          | 8.9 ± 1.6                      | 8.8 ± 1.5                         | 0.69   |
| GDM screen (mmol/l)                   | 11.5 ± 1.2         | 11.3 ± 1.5                     | 11.2 ± 1.3                        | 0.31   |
| Prepregnancy BMI (kg/m <sup>2</sup> ) | 27.7 ± 6.5         | 27.7 ± 6.2                     | 27.7 ± 6.8                        | 0.85   |
| A1C during pregnancy (%)              | 5.56 ± 0.53        | 5.7 ± 0.5                      | 5.6 ± 0.6                         | 0.88   |
| Insulin use during pregnancy          |                    |                                |                                   |        |
| Present                               | 549 (61.0)         | 287 (65.6)                     | 262 (55.6)                        | 0.003* |
| Absent                                | 350 (38.9)         | 146 (33.3)                     | 204 (43.3)                        |        |

Data are n (%) or means ± SD. P values were calculated with  $\chi^2$  test for categorical or *t* test for continuous variables. \*Significantly different between women adherent and nonadherent to postpartum testing.

performed, 72% of women with postpartum hyperglycemia would have been missed.

Among the characteristics examined, postpartum hyperglycemia was significantly associated with non-Caucasian ethnicity (OR 3.72, *P* < 0.001), previous GDM (OR 2.07, *P* = 0.01), higher pregnancy OGTT values (fasting 5.20 ± 0.73 vs. 4.96 ± 0.63 mmol/l, *P* = 0.01; 1-h PG 11.74 ± 1.31 vs. 10.86 ± 1.45 mmol/l, *P* = 0.001; 2-h PG 9.43 ± 1.71 vs. 8.73 ± 1.51, *P* = 0.003), higher A1C value (5.75 ± 0.61 vs. 5.50 ± 0.49, *P* = 0.001), and the use of insulin during pregnancy (OR 2.53, *P* = 0.002).

**CONCLUSIONS**— Despite attempts to improve adherence, <50% of our cohort underwent postpartum testing for glucose intolerance, and only higher parity and lack of insulin use were significantly associated with nonadherence to testing. Lack of child care as reflected by a higher parity may hinder testing, as has been previously reported (8). Insulin use in pregnancy may lead to a greater perceived risk of postpartum hyperglycemia among patients, but its role in promoting adherence to postpartum testing has been discrepant in the literature (8,9), the rea-

son for which is unclear. The contribution of socioeconomic status to general nonadherence to medical recommendation has been previously reported (10) but was not examined in this study. Possible contributors to the relatively low adherence rate include conflicting guidelines from the Canadian Diabetes Association versus the Society of Obstetrics and Gynecologists of Canada (11,12) and ambiguity as to which provider should arrange for testing (13), while a lack of medical resources unlikely contributes given a previously reported high adherence with postpartum cervical screening (14). Although phone reminders were used, a case manager and/or in-person postpartum follow-up may further improve adherence (8).

FPG is an inadequate screening tool to detect postpartum hyperglycemia, since the majority of cases will be missed. The lowering of FPG to 5.6 mmol/l has been suggested to improve diagnostic sensitivity in IFG, since this value more accurately reflects the increased risk for development of future diabetes or cardiovascular disease (15). However, even if a FPG cutoff of 5.6 mmol/l was applied to the cohort, 56% of cases of hyperglycemia

would be missed without completion of the 75-g OGTT.

Poor adherence to postpartum testing precludes early detection and timely intervention among these at-risk women. Given the rising incidence of postgestational hyperglycemia (1) and a lack of reliable predictors to identify nonadherence to postpartum testing, universal screening with an OGTT should be applied to this high-risk population.

**Acknowledgments**— No potential conflicts of interest relevant to this article were reported.

The authors would like to acknowledge the expert assistance of the metabolic center staff of the Grey Nuns Community Hospital.

## References

1. Kim C, Newton KM, Knopp RH. Gestational diabetes and the incidence of type 2 diabetes: a systematic review. *Diabetes Care* 2002;25:1862–1868
2. Metzger BE, Buchanan TA, Coustan DR, de Leiva A, Dungan DB, Hadden DR, Hod M, Kitzmiller JL, Kjos SL, Oats JN, Pettitt DJ, Sacks DA, Zouzas C. Summary and recommendations of the Fifth International Workshop-Conference on Gestational Diabetes Mellitus. *Diabetes Care* 2007;30(Suppl. 2):S251–S260

3. Expert Committee on the Diagnosis and Classification of Diabetes Mellitus: Follow-up report on the diagnosis of diabetes mellitus. *Diabetes Care* 2003;26:3160–3167
4. Kitzmiller JL, Dang-Kilduff L, Taslimi MM. Gestational diabetes after delivery. *Diabetes Care* 2007;30(Suppl. 2):S225–S235
5. Ferrara A, Peng T, Kim C. Trends in postpartum diabetes screening and subsequent diabetes and impaired fasting glucose among women with histories of gestational diabetes mellitus: a report from the Translating Research Into Action for Diabetes (TRIAD) Study. *Diabetes Care* 2009;32:269–274
6. Meltzer S, Leiter L, Daneman D, Gerstein HC, Lau D, Ludwig S, Yale JF, Zinman B, Lillie D. 1998 clinic practice guidelines for the management of diabetes in Canada: Canadian Diabetes Association. *CMAJ* 1998;159(Suppl. 8):S1–S29
7. Landy HJ, Gómez-Marín O, O'Sullivan MJ. Diagnosing gestational diabetes mellitus: use of a glucose screen without administering the glucose tolerance test. *Obstet Gynecol* 1996;87:395–400
8. Hunt KJ, Conway DL. Who returns for postpartum glucose screening following gestational diabetes mellitus? *Am J Obstet Gynecol* 2008;198:404.e1–e6
9. Baptiste-Roberts K, Barone BB, Gary TL, Golden SH, Wilson LM, Bass EB, Nicholson WK. Risk factors for type 2 diabetes among women with gestational diabetes: a systematic review. *Am J Med* 2009;122:207–214
10. Chaudhry HJ, McDermott B. Recognizing and improving patient nonadherence to statin therapy. *Curr Atheroscler Rep* 2008;10:19–24
11. Canadian Diabetes Association 2008 clinical practice guidelines for the prevention and management of diabetes in Canada: definition, classification, and diagnosis of diabetes and other dysglycemic categories. *Canadian Diabetes J* 2008;32(Suppl. 1):S10–S13
12. Berger H, Crane J, Farine D, Armson A, De La Ronde S, Keenan-Lindsay L. Screening for gestational diabetes mellitus: SOGC Clinical Practice Guideline. *J Obstet Gynaecol Can* 2002;24:894–903
13. Almario CV, Ecker T, Moroz LA, Bucovetsky L, Berghella V, Baxter JK. Obstetricians seldom provide postpartum diabetes screening for women with gestational diabetes. *Am J Obstet Gynecol* 2008;198:528.e1–e5
14. Smirnakis KV, Chasan-Taber L, Wolf M, Markenson G, Ecker JL, Thadhani R. Postpartum diabetes screening in women with a history of gestational diabetes. *Obstet Gynecol* 2005;106:1297–1303
15. American Diabetes Association. Diagnosis and classification of diabetes mellitus. *Diabetes Care* 2004;27(Suppl. 1):S5–S10
